# Supplementary material for: A Pair of Multifunctional Cu(II)–Dy(III) Enantiomers with Zero–Field Single–Molecule Magnet Behaviors, Proton Conduction Properties and Magneto–Optical Faraday Effects
Source: MDPI journal article supplement (doi:10.3390/molecules28227506), 2023-11-09
Supplement: s1 [file s1]

# Supporting Information

## A pair of multifunctional Cu(II)-Dy(III) enantiomers with zero-field single molecule magnet behaviours, proton conduction properties and magneto-optical Faraday effects

Shui-Dong Zhu<sup>1</sup>, Yu-Lin Zhou<sup>1</sup>, Fang Liu<sup>1</sup>, Yu Lei<sup>1</sup>, Sui-Jun Liu<sup>2</sup>, He-Rui Wen<sup>2</sup>, Bin Shi<sup>1</sup>, Shi-Yong Zhang<sup>1</sup>, Cai-Ming Liu<sup>3,\*</sup> and Ying-Bing Lu<sup>1,\*</sup>

<sup>1</sup>College of Chemistry and Chemical Engineering, Gannan Normal University, Ganzhou 341000, Jiangxi P. R. China.

<sup>2</sup>School of Chemistry and Chemical Engineering, Jiangxi Provincial Key Laboratory of Functional Molecular Materials Chemistry, Jiangxi University of Science and Technology, Ganzhou 341000, Jiangxi Province, People's Republic of China.

<sup>3</sup>Beijing National Laboratory for Molecular Sciences, CAS Key Laboratory of Organic Solids, Institute of Chemistry, Chinese Academy of Sciences, Beijing 100190, P. R. China.

E-mail: ybluhm@163.com, cmliu@iccas.ac.cn, zsd2002@sina.com

**Table S1.** Crystal data for **R-1** and **S-1**.

**Table S2.** Selected bond lengths (Å) and angles (°) for **R-1** and **S-1**.

**Table S3** Summary of SHAPE analysis for **R-1**.

**Table S4.** H-bonding length and angle table for **R-1**.

**Figure S1.** The asymmetric unit of **R-1** with 40% thermal ellipsoids. Symmetry codes: A:  $x, 1-y, -z$ . The H atoms are omitted for clarity;

**Figure S2.** The structure of the H<sub>4</sub>L ligand;

**Figure S3.** The coordinated geometry of Dy1, Cu1, and Cu2.

**Figure S4.** The 1-D supramolecular chain of **R-1** connected through hydrogen bonds along the *bc* plane (green dashed line);

**Figure S5.** The 2-D supramolecular layer of **R-1** connected through hydrogen bonds along the *ab* plane (green dashed line);

**Figure S6.** (a) PXRD patterns of the simulated one, as-synthesized **R-1** and **S-1** and after proton conduction of **R-1**; (b) PXRD patterns of **R-1** after heated at different temperature for 24 hours.

**Figure S7.** The TGA plot of **R-1** and **S-1**.

**Figure S8.** CD spectra of enantiomers **R-1** and **S-1** in a CH<sub>3</sub>CN solution ( $c = 0.02 \text{ g}\cdot\text{L}^{-1}$ ) at room temperature.

**Figure S9.** UV spectra of enantiomers **R-1** and **S-1** in CH<sub>3</sub>CN solution ( $c = 0.02 \text{ g}\cdot\text{L}^{-1}$ ) at room temperature;

**Figure S10.** (a)  $\chi_{\text{MT}}$  vs T plots for **R-1** at 1000 Oe. (b) Field-dependent magnetization for **R-1**.

**Figure S11.** Plot of  $\ln(\tau)$  versus  $T^{-1}$  for **R-1**, the red solid line is fitted with the Arrhenius law.

**Figure S12.** The  $\chi''$ - $\nu$  curves for **R-1**.

**Figure S13.** (a) Plot of  $\ln(\tau)$  versus  $T^{-1}$  for **R-1**, the red solid line is fitted with the Arrhenius law. (b) Cole–Cole plots of **R-1** under zero dc field (the yellow solid line represents the least-squares fitting by using CC-FIT software).

**Table S5.** Linear combination of two modified Debye model fitting parameters from 2.0 to 4.1 K at  $H_{\text{dc}} = 0 \text{ Oe}$ .

**Table S6.** The proton conductivity of **R-1** at 25 °C under variable relative humidity (RH).

**Table S7.** The proton conductivity of **R-1** at 100 % RH under variable temperature (°C).

**Table S8.** Comparison of the properties of proton conduction, single molecule magnet (SMM) and magneto-optical Faraday effect of **R-1** with that of the complexes based on chiral Schiff ligands.

**Table S1.** Crystal data for **R-1** and **S-1**.

|                                                    | <b>R-1</b>                                                                       | <b>S-1</b>                                                                       |
|----------------------------------------------------|----------------------------------------------------------------------------------|----------------------------------------------------------------------------------|
| Formula                                            | C <sub>40</sub> H <sub>48</sub> Cu <sub>2</sub> DyN <sub>7</sub> O <sub>21</sub> | C <sub>40</sub> H <sub>48</sub> Cu <sub>2</sub> DyN <sub>7</sub> O <sub>21</sub> |
| Fw                                                 | 1252.43                                                                          | 1252.43                                                                          |
| Temp (K)                                           | 293(2)                                                                           | 293(2)                                                                           |
| Crystal system                                     | monoclinic                                                                       | monoclinic                                                                       |
| Space group                                        | <i>C</i> <sub>2</sub>                                                            | <i>C</i> <sub>2</sub>                                                            |
| <i>a</i> , Å                                       | 29.2637(12)                                                                      | 29.338(3)                                                                        |
| <i>b</i> , Å                                       | 8.4552(3)                                                                        | 8.4822(4)                                                                        |
| <i>c</i> , Å                                       | 24.0200(9)                                                                       | 24.123(2)                                                                        |
| $\beta$ , (deg)                                    | 126.913(2)                                                                       | 127.002(13)                                                                      |
| <i>D</i> <sub>c</sub> , g/cm <sup>3</sup>          | 1.751                                                                            | 1.735                                                                            |
| <i>V</i> , Å <sup>3</sup>                          | 4751.9(3)                                                                        | 4794.2(9)                                                                        |
| <i>Z</i>                                           | 4                                                                                | 4                                                                                |
| $\mu$ (mm <sup>-1</sup> )                          | 2.531                                                                            | 2.509                                                                            |
| F (000)                                            | 2516.0                                                                           | 2516.0                                                                           |
| Reflns collected                                   | 34860                                                                            | 10828                                                                            |
| Independent reflns                                 | 10741                                                                            | 8522                                                                             |
| <i>R</i> <sub>int</sub>                            | 0.0370                                                                           | 0.0167                                                                           |
| Theta range, °                                     | 5.938–54.938                                                                     | 7.092–58.554                                                                     |
| Params/restraints/data                             | 654 / 130/ 10741                                                                 | 654 / 168 / 8522                                                                 |
| <i>R</i> <sub>1</sub> [ <i>I</i> > 2σ( <i>I</i> )] | 0.0415                                                                           | 0.0439                                                                           |
| w <i>R</i> <sub>2</sub> (all data)                 | 0.0827                                                                           | 0.0944                                                                           |
| GOF on <i>F</i> <sup>2</sup>                       | 1.063                                                                            | 1.027                                                                            |
| $\rho_{\max}/\rho_{\min}$ , e Å <sup>-3</sup>      | 0.84/ –0.95                                                                      | 0.83 / –0.53                                                                     |

$$^aR1 = ||F_o|-|F_c| ||/|F_o|; ^b wR2 = [w(F_o^2 - F_c^2)^2] / [w(F_o^2)^2]^{1/2}$$

**Table S2.** Selected bond lengths (Å) and angles (°) for **R-1** and **S-1**.

| Complex <b>R-1</b> (bond) | lengths (Å) | (angle)             | angles (°) |
|---------------------------|-------------|---------------------|------------|
| Dy(1)-O(1)                | 2.488(6)    | O(1)-Dy(1)-O(1) #1  | 76.9(5)    |
| Dy(1)-O(2)                | 2.309(5)    | O(1)#1-Dy(1)-O(4)#1 | 145.0(3)   |
| Dy(1)-O(3)                | 2.343(1)    | O(1)#1-Dy(1)-O(4)   | 72.2(4)    |
| Dy(1)-O(4)                | 2.567(6)    | O(1)-Dy(1)-O(4)     | 145.0(3)   |
| Dy(1)-O1W                 | 2.375(9)    | O(1)-Dy(1)-O(4) #1  | 72.2(4)    |
| Dy(2)-O3 W                | 2.371(11)   | O1W-Dy(1)-O(4)      | 70.4(2)    |
| Dy(2)-O(5)                | 2.556(7)    | O1W-Dy(1)-Cu1       | 92.98(2)   |
| Dy(2)-O(6)                | 2.319(6)    | O(3)-Cu1-O(2)       | 82.1(2)    |
| Dy(2)-O(8)                | 2.483(7)    | O3W-Dy(2)-O(8)      | 141.4(2)   |
| Dy(2)-O(7)                | 2.311(5)    | O6#2-Dy(2)-O3 W     | 76.6(2)    |
| Cu(1)-O2W                 | 2.351(4)    | O(6)-Dy(2)-O(5)     | 62.6(2)    |
| Cu(1)-N(1)                | 1.954(1)    | O(6)#2-Dy(2)-O(5)   | 108.0(2)   |
| Cu(1)-N(2)                | 1.909(7)    | O(7)#2-Dy(2)-O3W    | 113.01(2)  |
| Cu(1)-O(2)                | 1.925(6)    | O(6)-Dy(2)-O8       | 126.6(2)   |
| Cu(1)-O(3)                | 1.890(5)    |                     |            |
| Cu(2)-N(3)                | 1.921(9)    |                     |            |
| Cu(2)-O(6)                | 1.923(5)    |                     |            |
| Complex <b>S-1</b> (bond) | lengths (Å) | (angle)             | angles (°) |
| Dy(1)-O(1)                | 2.536(10)   | O(3)-Dy(1)-O(3) #1  | 135.3(5)   |
| Dy(1)-O(1)#1              | 2.536(10)   | O(3)-Dy(1)-O(2)#1   | 125.8(3)   |
| Dy(1)-O(2)                | 2.352(10)   | O(3)#1-Dy(1)-O(2)#1 | 64.4(3)    |
| Dy(1)-O(2)#1              | 2.352(10)   | O(3)-Dy(1)-O(2)     | 64.4(3)    |
| Dy(1)-O(3)                | 2.309(9)    | O(3)#1-Dy(1)-O(2)   | 125.8(3)   |
| Dy(2)-O(3)W               | 2.398(18)   | O(3) W-Dy(2)-O(5)   | 141.2(2)   |
| Dy(2)-O(5)                | 2.493(10)   | O(5)-Dy(2)-O( 8 )   | 146.0(4)   |
| Dy(2)-O(6)                | 2.334(11)   | O(6)-Dy(2)-O5       | 63.7(3)    |
| Dy(2)-O(8)                | 2.588(10)   | O(6)-Dy(2)-O3 W     | 114.5(3)   |
| Cu(1)-O2W                 | 2.369(11)   | O(6)#2-Dy(2)-O(5)   | 78.2(4)    |
| Cu(1)-N(1)                | 1.939(11)   |                     |            |
| Cu(2)-N(3)                | 1.923(13)   |                     |            |

Symmetry Codes for **R-1**: #1 1-x, +y, 2-z , #2 1-x, +y, 1-z ; For **S-1**: #1 2-x, +y, 2-z, #2 1-x, +y, 1-z.

**Table S3** Summary of SHAPE analysis for ***R-1***.

| Metal | label          | shape                          | symmetry                   | Distortion( $\tau$ ) |
|-------|----------------|--------------------------------|----------------------------|----------------------|
| Dy1   | EP-9           | Enneagon                       | $D_{9h}$                   | 35.283               |
|       | OPY-9          | Octagonal pyramid              | $C_{8v}$                   | 21.351               |
|       | HBPY-9         | Hexagonal bipyramid            | $D_{7h}$                   | 18.194               |
|       | JTC-9          | Johnson triangular cupola J3   | $C_{3v}$                   | 15.327               |
|       | JCCU-9         | Capped cube J8                 | $C_{4v}$                   | 9.578                |
|       | CCU-9          | Spherical-relaxed capped cube  | $C_{4v}$                   | 8.625                |
|       | JCSAPR-9       | Capped square antiprism J10    | $C_{4v}$                   | 3.607                |
|       | <b>CSAPR-9</b> | <b>Capped square antiprism</b> | <b><math>C_{4v}</math></b> | <b>2.264</b>         |
|       | JTCTPR-9       | Tricapped trigonal prism J51   | $D_{3h}$                   | 5.320                |
| Dy2   | EP-9           | Enneagon                       | $D_{9h}$                   | 35.045               |
|       | OPY-9          | Octagonal pyramid              | $C_{8v}$                   | 21.692               |
|       | HBPY-9         | Hexagonal bipyramid            | $D_{7h}$                   | 17.767               |
|       | JTC-9          | Johnson triangular cupola J3   | $C_{3v}$                   | 15.306               |
|       | JCCU-9         | Capped cube J8                 | $C_{4v}$                   | 9.022                |
|       | CCU-9          | Spherical-relaxed capped cube  | $C_{4v}$                   | 8.054                |
|       | JCSAPR-9       | Capped square antiprism J10    | $C_{4v}$                   | 3.745                |
|       | <b>CSAPR-9</b> | <b>Capped square antiprism</b> | <b><math>C_{4v}</math></b> | <b>2.370</b>         |
|       | JTCTPR-9       | Tricapped trigonal prism J51   | $D_{3h}$                   | 5.547                |
| Cu1   | HP-6           | Hexagon                        | $D_{6h}$                   | 29.181               |
|       | PPY-6          | Pentagonal pyramid             | $C_{5v}$                   | 26.936               |
|       | <b>OC-6</b>    | <b>Octahedron</b>              | <b><math>O_h</math></b>    | <b>3.460</b>         |
|       | TPR-6          | Trigonal prism                 | $D_{3h}$                   | 16.876               |
|       | JPPY-6         | Johnson pentagonal pyramid J2  | $C_{5v}$                   | 28.982               |
| Cu2   | HP-6           | Hexagon                        | $D_{6h}$                   | 31.143               |
|       | PPY-6          | Pentagonal pyramid             | $C_{5v}$                   | 27.421               |
|       | <b>OC-6</b>    | <b>Octahedron</b>              | <b><math>O_h</math></b>    | <b>2.831</b>         |
|       | TPR-6          | Trigonal prism                 | $D_{3h}$                   | 17.132               |
|       | JPPY-6         | Johnson pentagonal pyramid J2  | $C_{5v}$                   | 30.002               |

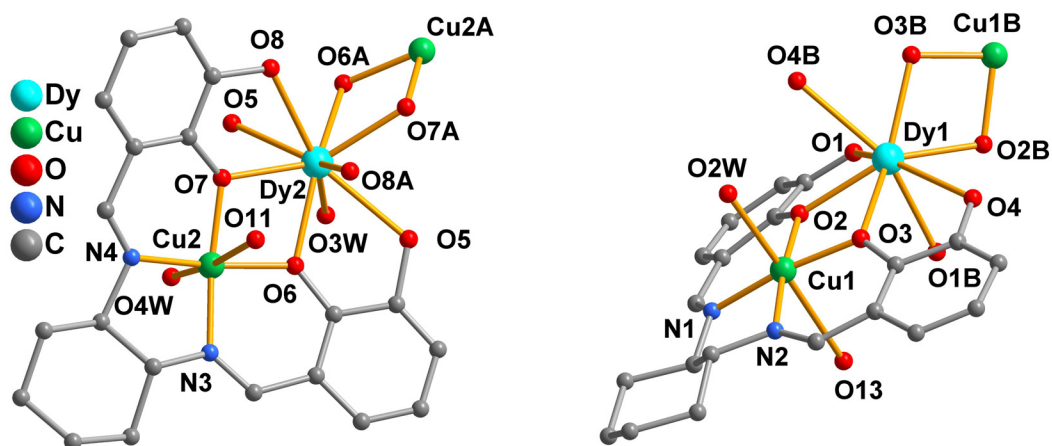

**Figure S1.** The asymmetric unit of **R-1** with 40% thermal ellipsoids. Symmetry codes: A:  $-x, y, 1-z$ ; B:  $1-x, y, 2-z$ . The H atoms are omitted for clarity;

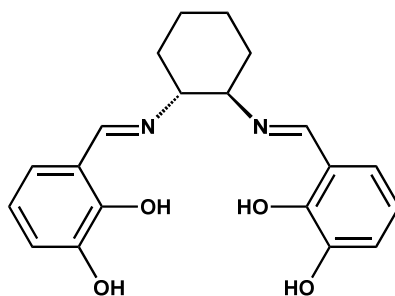

**Figure S2.** The structure of the H<sub>4</sub>L ligand.

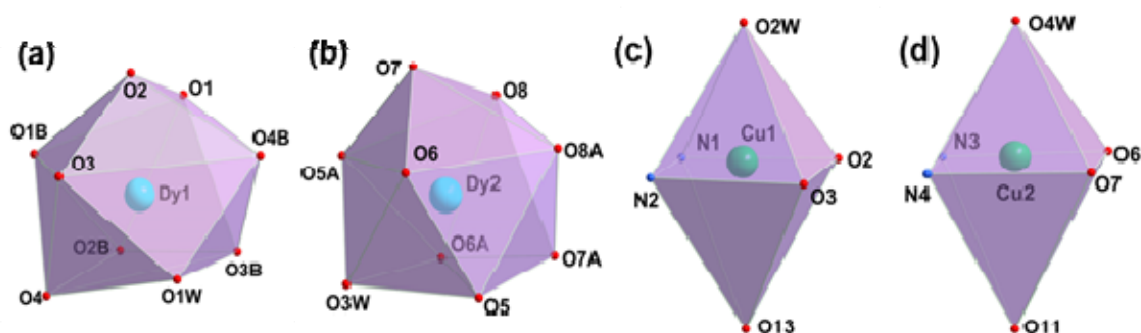

**Figure S3.** The coordination geometry of Dy1, Dy2, Cu1 and Cu2.

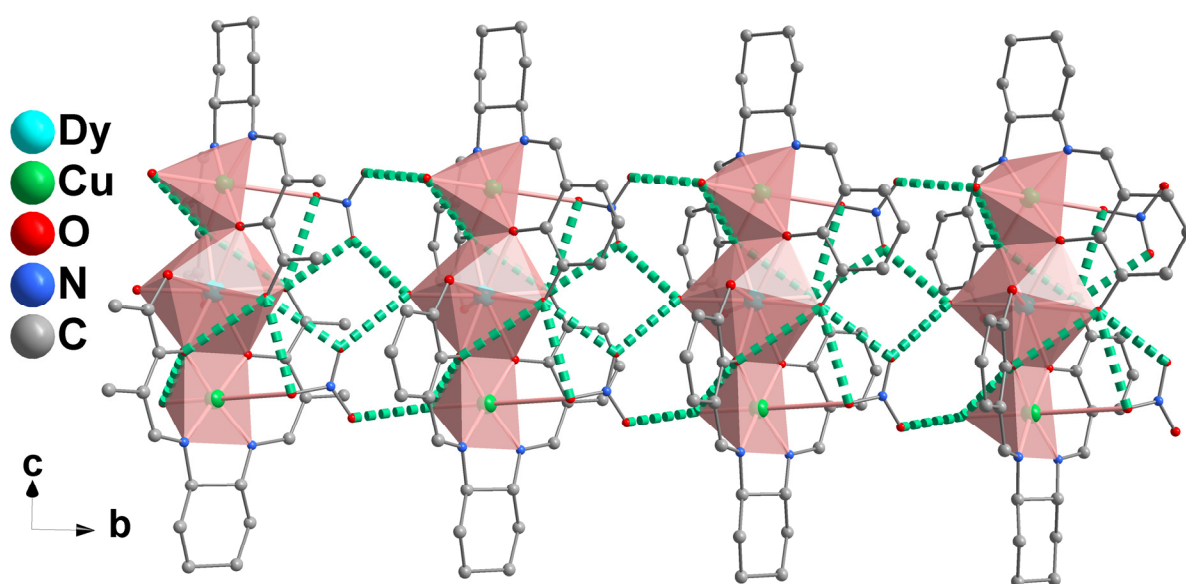

**Figure S4.** The 1-D supramolecular chain of **R-1** connected through hydrogen bonds along the *bc* plane (green dashed line).

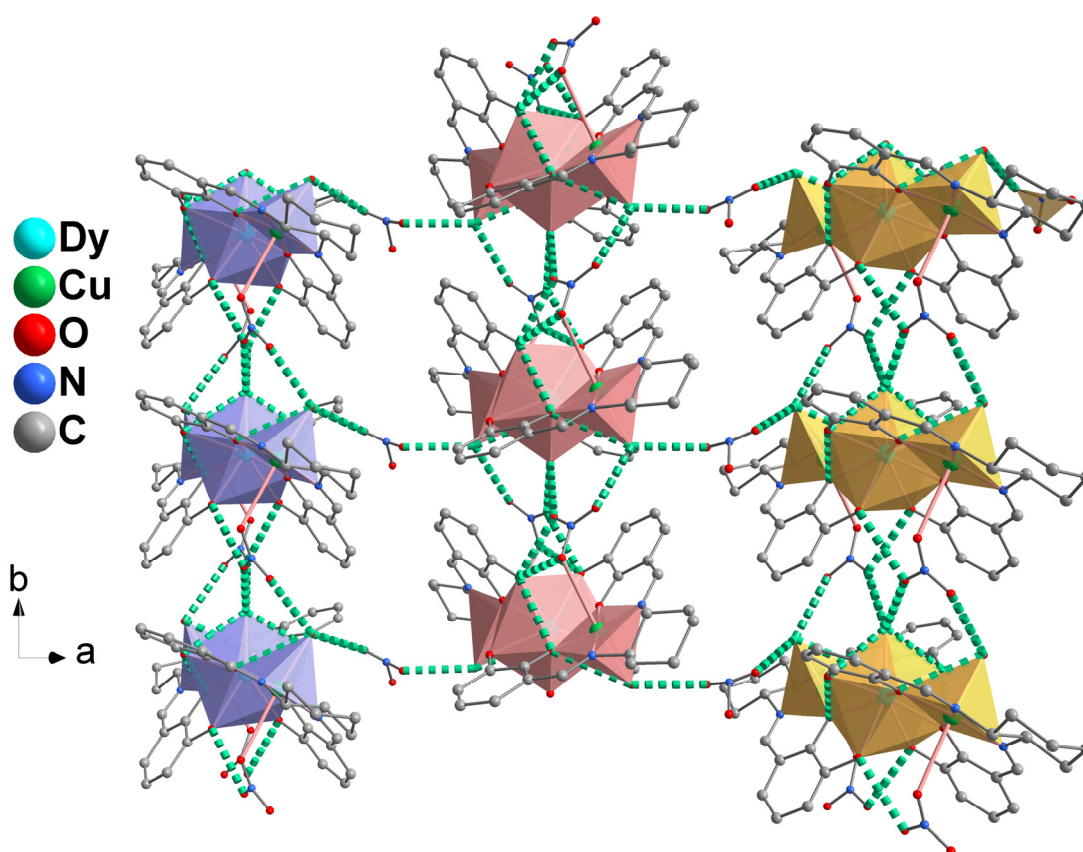

**Figure S5.** The 2-D supramolecular layer of **R-1** connected through hydrogen bonds along the *ab* plane (green dashed line).

**Table S4.** H-bonding length and angle table for *R*-1

| D–H···A        | d(D...A)(Å) | <DHA(Å)   |
|----------------|-------------|-----------|
| O1–H1···O12    | 2.715(18)   | 118       |
| O1–H1···O13    | 3.06(2)     | 161       |
| O1W–H1WA···O12 | 2.769(18)   | 132       |
| O1W–H1WB···O12 | 2.769(18)   | 133       |
| O2W–H2WA···O14 | 2.83(3)     | 168       |
| O4–H4···O5W    | 2.80(3)     | 153       |
| O2W–H2WB···O15 | 2.70(3)     | 142       |
| O5–H5A···O16   | 2.56(2)     | 144(7)    |
| O3W–H3WA···O9  | 2.76(2)     | 168       |
| O3W–H3WB···O9  | 2.76(2)     | 168       |
| O4W–H4WA···O16 | 3.19(3)     | 161       |
| O5W–H5WB···O15 | 2.68(3)     | 139       |
| O1–H1···O2     | 3.0701(1)   | 84.255(3) |
| O4–H4···O2     | 2.8814(1)   | 84.861(3) |
| O2W–H4···O3    | 3.0450(1)   | 72.206(2) |
| O1W–H4···O3    | 2.9086(1)   | 86.491(2) |
| O8–H8A···O9    | 2.87(2)     | 162(5)    |
| O8–H8A···O11   | 2.977(18)   | 137(4)    |



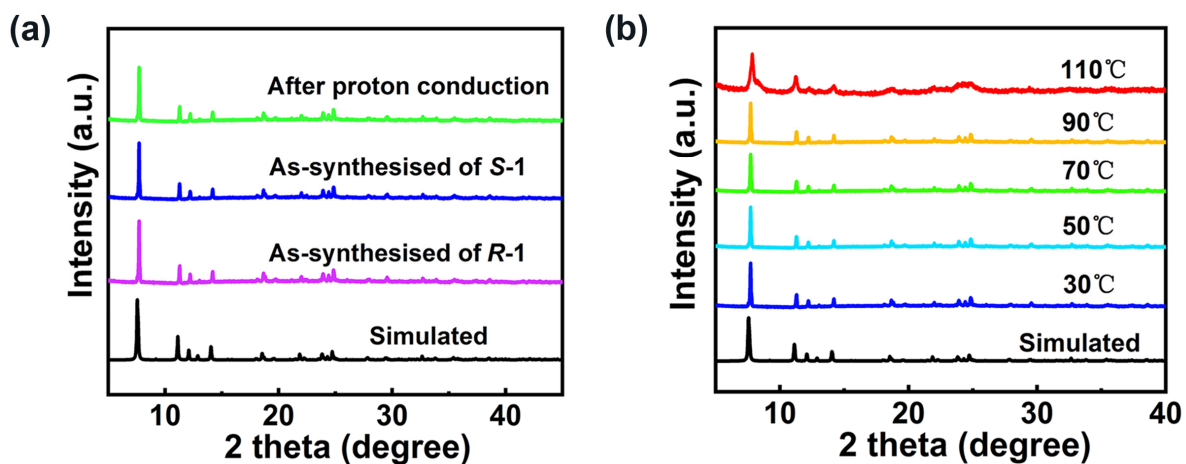

**Figure S6.** (a) PXRD patterns of the simulated one, as-synthesized *R-1* and *S-1* and after proton conduction of *R-1*; (b) PXRD patterns of *R-1* after heated at different temperature for 24 hours.

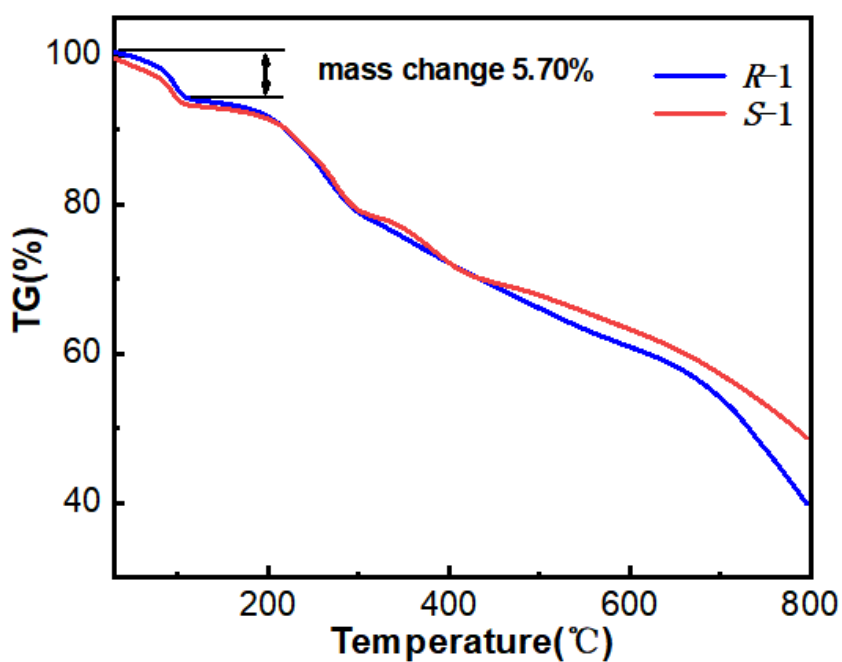

**Figure S7.** The TGA plot of *R-1* and *S-1*

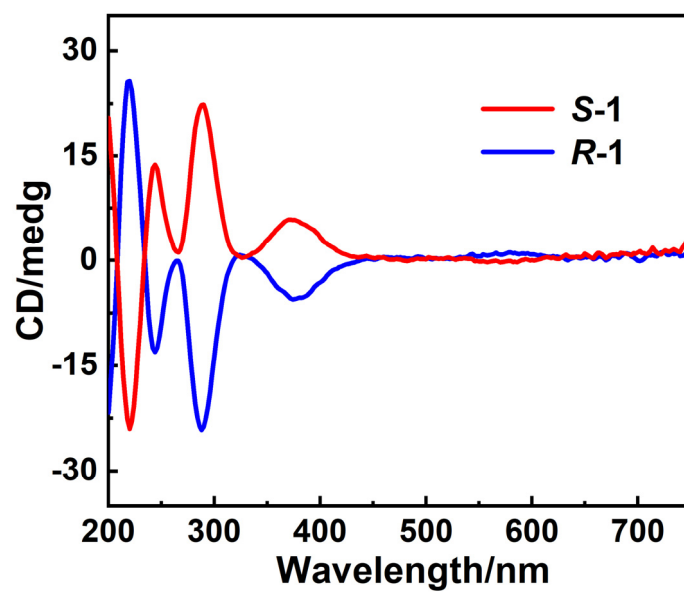

**Figure S8.** CD spectra of enantiomers *R*-1 and *S*-1 in a CH<sub>3</sub>CN solution ( $c = 0.02 \text{ g}\cdot\text{L}^{-1}$ ) at room temperature.

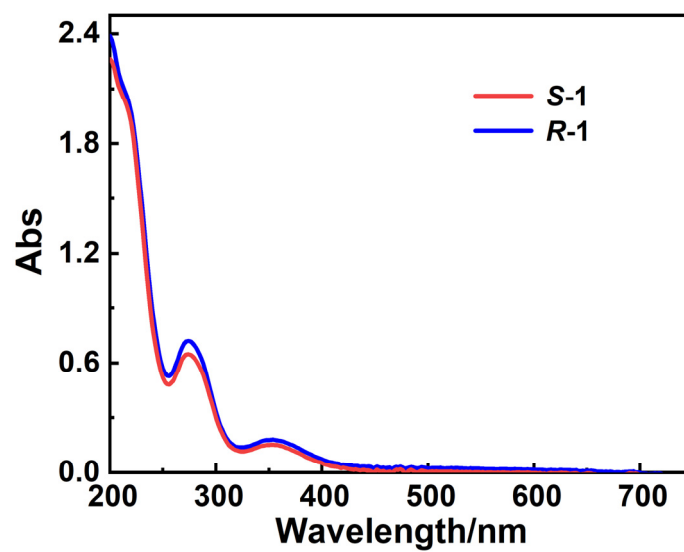

**Figure S9.** UV spectra of enantiomers *R*-1 and *S*-1 in CH<sub>3</sub>CN solution ( $c = 0.02 \text{ g}\cdot\text{L}^{-1}$ ) at room temperature.

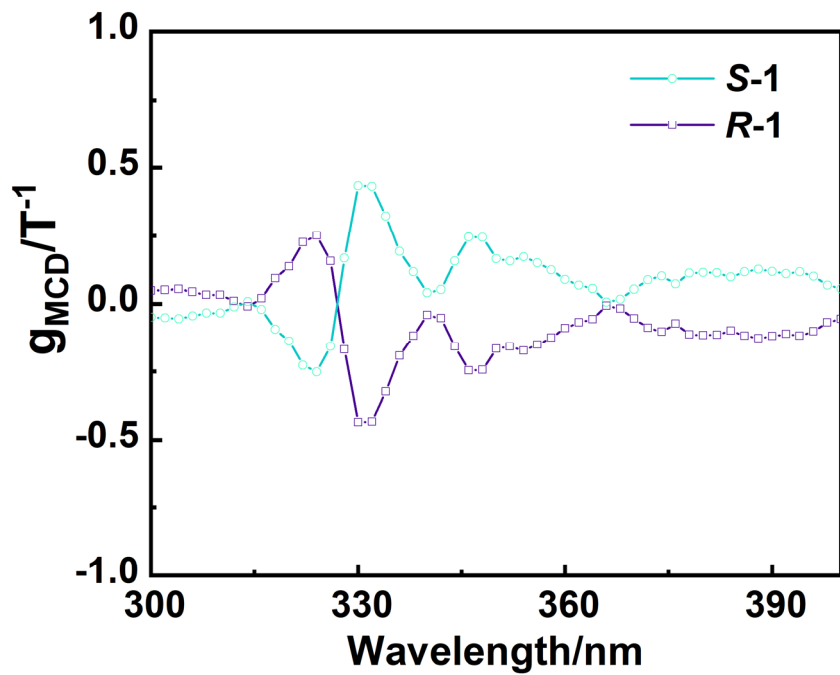

Figure S10. the  $g$  (MCD) values of *R*-1 and *S*-1 at room temperature

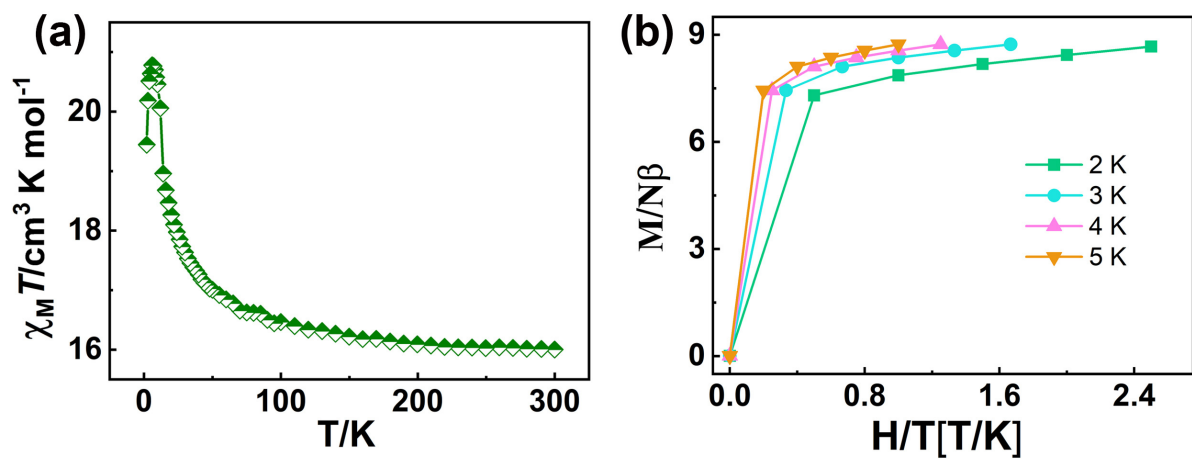

Figure S11. (a)  $\chi_M T$  vs  $T$  plots for *R*-1 at 1000 Oe. (b) Field-dependent magnetization for *R*-1.

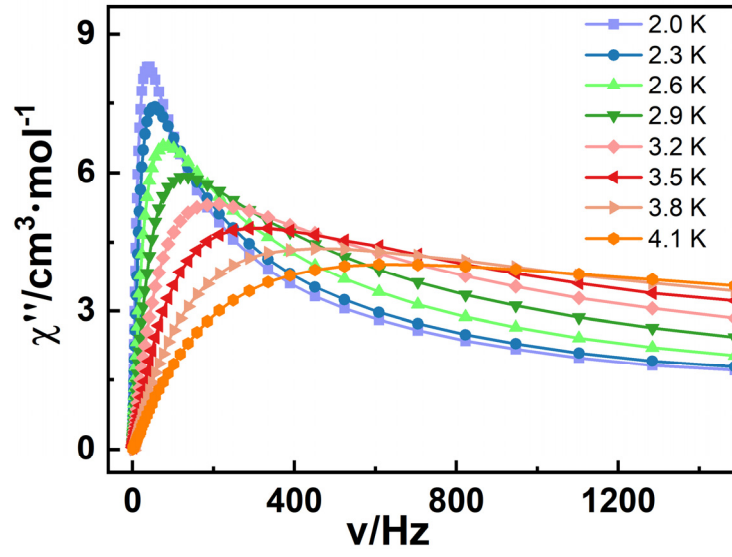

Figure S12. The  $\chi''$ - $\nu$  curves for *R*-1.

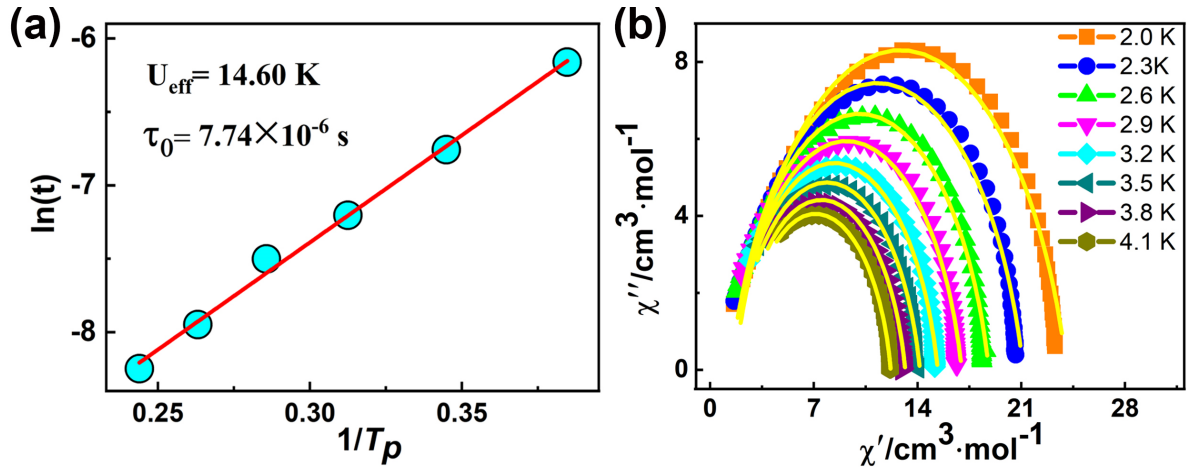

Figure S13. (a) Plot of  $\ln(\tau)$  versus  $T^{-1}$  for *R*-1, the red solid line is fitted with the Arrhenius law. (b) Cole-Cole plots of *R*-1 under zero dc field (the yellow solid line represents the least-squares fitting by using CC-FIT software).

**Table S5.** Linear combination of two modified debye model fitting parameters from 2.0 to 4.1 K at  $H_{dc} = 0$  Oe.

| T/K | $\tau/s$ | $\alpha$ |
|-----|----------|----------|
| 2.0 | 0.00035  | 0.19018  |
| 2.3 | 0.00253  | 0.17715  |
| 2.6 | 0.00164  | 0.17102  |
| 2.9 | 0.00011  | 0.16663  |
| 3.2 | 0.00070  | 0.16238  |
| 3.5 | 0.00047  | 0.15909  |
| 3.8 | 0.00033  | 0.15236  |
| 4.1 | 0.00024  | 0.14017  |

**Table S6.** The proton conductivity of **R-1** at 25 °C under variable relative humidity (RH).

| RH / % | $\sigma / \text{S cm}^{-1}$ |
|--------|-----------------------------|
| 60     | $1.18 \times 10^{-9}$       |
| 70     | $6.08 \times 10^{-9}$       |
| 80     | $3.15 \times 10^{-8}$       |
| 90     | $3.24 \times 10^{-7}$       |
| 100    | $7.44 \times 10^{-5}$       |

**Table S7.** The proton conductivity of **R-1** at 100 % RH under variable temperature (°C).

| Temperature / °C | $\sigma / \text{S cm}^{-1}$ |
|------------------|-----------------------------|
| 25               | $7.44 \times 10^{-5}$       |
| 30               | $8.51 \times 10^{-5}$       |
| 35               | $9.44 \times 10^{-5}$       |
| 40               | $1.29 \times 10^{-4}$       |
| 50               | $1.34 \times 10^{-4}$       |

**Table S8.** Comparison of the properties of proton conduction, single molecule magnet (SMM) and magneto-optical Faraday effect of *R*-**1** with that of complex based on Schiff ligands.  $\sigma$  represents proton conductivity and RH stands for relative humidity.

| Compounds                                                                                                                                                                                                                                                | $U_{eff}/k$ (K)                      | Conductivity<br>(S cm <sup>-1</sup> )                                          | $ g_{\max(\text{MCD})} $<br>(T <sup>-1</sup> )                 | References                                                                     |
|----------------------------------------------------------------------------------------------------------------------------------------------------------------------------------------------------------------------------------------------------------|--------------------------------------|--------------------------------------------------------------------------------|----------------------------------------------------------------|--------------------------------------------------------------------------------|
| (DyCu <sub>2</sub> [ <i>RR/SS</i> -L] <sub>2</sub> [H <sub>2</sub> O] <sub>3</sub> )·(NO <sub>3</sub> ) <sub>3</sub> ·(H <sub>2</sub> O)<br>( <i>R</i> - <b>1</b> and <i>S</i> - <b>1</b> )                                                              | 17.70<br>( <i>R</i> - <b>1</b> )     | $1.34 \times 10^{-4}$ under<br>50 °C and 98%<br>( <i>R</i> - <b>1</b> )        | 0.435 ( <i>R</i> - <b>1</b> )<br>0.433 ( <i>S</i> - <b>1</b> ) | This work                                                                      |
| [Cu <sub>6</sub> Dy <sub>3</sub> ( <i>R</i> -L) <sub>6</sub> (OH) <sub>6</sub> (H <sub>2</sub> O) <sub>6</sub> ](<br>ClO <sub>4</sub> )(NO <sub>3</sub> ) <sub>2</sub> ·4.75H <sub>2</sub> O·8.5Me<br>OH ( <i>R</i> - <b>1</b> and <i>S</i> - <b>1</b> ) | 19.5(0.6)<br>( <i>R</i> - <b>1</b> ) | $4.77 \times 10^{-6}$ under<br>80 °C and 100%<br>RH<br>( <i>R</i> - <b>1</b> ) | 0.58 ( <i>R</i> - <b>1</b> )<br>0.58 ( <i>S</i> - <b>1</b> )   | <i>Inorg. Chem.</i><br><i>Front.</i> , <b>2023</b> ,<br>10.1039/d3qi0<br>0634d |
